# Supplementary material for: Loss of FBXO9 Enhances Proteasome Activity and Promotes Aggressiveness in Acute Myeloid Leukemia
Source: PubMed Central journal article supplement (PMC6895989; doi:10.3390/cancers11111717), 2019-11-03
Supplement: cancers-11-01717-s001.pdf [file cancers-11-01717-s001.pdf]

## Supplemental Materials and Methods

**Table S1.** MS Supplemental Table\_AML.

| <b>Genotyping Primer</b> | <b>Sequence</b>                          |
|--------------------------|------------------------------------------|
| Fbxo9 5' F               | 5' – GTC TCT TCG AGG CAG AAC GTA TC – 3' |
| Fbxo9 5' R               | 5' – GCA ACG GGA TCA GAT GTC CAA TG – 3' |
| Fbxo9 3' F               | 5' – GCC TGA GAC TGA AAG ATC CTT GC – 3' |
| Fbxo9 3' R               | 5' – CAG GCT TAC AAA GAG GGC CTA CG – 3' |
| Hygro F                  | 5' – CCA TCG TCG AGA TCC AGA CAT – 3'    |
| Hygro R                  | 5' – GTA TAT GCT CCG CAT TGG TCT TG – 3' |
| Generic Cre F            | 5' – GCG GTC TGG CAG TAA AAA CTA TC – 3' |
| Generic Cre R            | 5' – GTG AAA CAG CAT TGC TGT CAC TT – 3' |
| Inv Post F               | 5' – CCC CCG TAC TGT GTG TGT CT – 3'     |
| Inv Post R               | 5' – GCC AGA CGG GTC AAC AAT AC – 3'     |

  

| <b>qRT-PCR Primer</b> | <b>Sequence</b>                         |
|-----------------------|-----------------------------------------|
| Gapdh F               | 5' – CAT GGC CTT CCG TGT TCC TA – 3'    |
| Gapdh R               | 5' – CTG GTC CTC AGT GTA GCC CAA – 3'   |
| Fbxo9 Exon 4 F        | 5' – AGA AGC TCT ATG CTG AAA GCA G – 3' |
| Fbxo9 Exon 4 R        | 5' – CAT CGC CCT ACG GTA GAA CT – 3'    |
| Fbxo9 Exon 2-3 F      | 5' – ATG AGA GTC CGG CTG AGA GA – 3'    |
| Fbxo9 Exon 2-3 R      | 5' – AGA GCT TCT TCC TGC TCT GC – 3'    |

### Western Blot Antibodies:

| <b>Antibody</b> | <b>Company</b> | <b>Ref#</b> |
|-----------------|----------------|-------------|
| ARF-1           | Proteintech    | 10790-1-AP  |
| B-actin-HRP     | Santa Cruz     | sc-47778    |
| FLAG-HRP        | Proteintech    | 12926-1-AP  |
| PSMA2           | Bethyl         | A303-816A   |
| PSMB7           | Bethyl         | A303-848A   |
| PSMD11          | Cell Signaling | 14303S      |

### Flow Cytometry Antibodies

| <b>Antibody</b> | <b>Fluorochrome</b>                     | <b>Clone</b> | <b>Company</b>            |
|-----------------|-----------------------------------------|--------------|---------------------------|
| 7-AAD           | n/a                                     | n/a          | eBioscience               |
| Annexin V       | PE                                      | n/a          | BioLegend                 |
| B220            | PacBlue, BV510, APCcy7, APC, Biotin, PE | RA3-6B2      | BioLegend                 |
| CD4             | APCcy7, APC, Biotin, PE                 | CK1.5        | BioLegend                 |
| CD8             | APCcy7, APC, Biotin, PE                 | 53-6.7       | BioLegend,<br>eBioscience |
| CD11b           | FITC, APCcy7, APC, Biotin, PE           | M1/70        | BioLegend                 |
| CD16/32         | FITC, APC                               | 93           | BioLegend                 |
| CD34            | APC, PE                                 | HM34         | BioLegend                 |
| CD48            | FITC                                    | HM48-1       | BioLegend                 |
| CD131           | PE                                      | n/a          | BD Pharmingen             |
| CD150           | BV510, BV785                            | TC15-12F12.2 | BioLegend                 |
| cKit            | APC, BV421, PacBlue                     | 2B8          | BioLegend                 |
| Gr-1            | APCcy7, APC, Biotin, PE, BV421          | RB6-8C5      | BioLegend                 |
| Ki67            | FITC                                    | 16A8         | BioLegend                 |
| Sca-1           | PE, PEcy7                               | D7           | BioLegend,<br>eBioscience |
| Strep           | FITC                                    | n/a          | BioLegend                 |
| Ter-119         | APCcy7, PacBlue, APC, Biotin, PE        | TER-119      | BioLegend                 |

| <b>Class</b> | <b>MILE Study Diagnosis</b>          | <b>No of Samples</b> |
|--------------|--------------------------------------|----------------------|
| HBM          | Non-leukemia and healthy bone marrow | 74                   |
| MDS          | Myelodysplastic syndrome             | 206                  |
| Normal       | AML with normal karyotype            | 351                  |
| Complex      | AML with complex karyotype           | 48                   |
| inv(16)      | AML with inv(16)/t(16;16)            | 28                   |
| t(15;17)     | AML with t(15;17)                    | 37                   |
| t(8;21)      | AML with t(8;21)                     | 40                   |
| MLL          | AML with t(11q23)/MLL                | 38                   |
| CML          | Chronic myeloid leukemia             | 76                   |
| Total        |                                      | 898                  |

  

| <b>Class</b> | <b>TARGET Study Diagnosis</b>        | <b>No of Samples</b> |
|--------------|--------------------------------------|----------------------|
| HBM          | Non-leukemia and healthy bone marrow | 5                    |
| Unknown      | AML with unknown diagnosis           | 10                   |
| Normal       | AML with normal karyotype            | 53                   |
| inv(16)      | AML with inv(16)/t(16;16)            | 36                   |
| t(8;21)      | AML with t(8;21)                     | 45                   |
| MLL          | AML with t(11q23)/MLL                | 41                   |
| Other        | AML with other diagnoses             | 47                   |
| Total        |                                      | 237                  |

  

| <b>FAB Subtype</b> | <b>TCGA Study Diagnosis</b>             | <b>No of Samples</b> |
|--------------------|-----------------------------------------|----------------------|
| AML M0             | AML with minimal maturation             | 15                   |
| AML M1             | AML without maturation                  | 41                   |
| AML M2             | AML with maturation                     | 42                   |
| AML M3             | Acute promyelocytic leukemia            | 15                   |
| AML M4             | Acute myelomonocytic leukemia           | 37                   |
| AML M5             | Acute monoblastic or monocytic leukemia | 22                   |
| AML M6             | Acute erythroid leukemia                | 2                    |
| AML M7             | Acute megakaryoblastic leukemia         | 3                    |
| Other              | Other subtype                           | 2                    |
| Total              |                                         | 179                  |

#### **Mass Spectrometry Method:**

Samples were loaded onto trap column Acclaim PepMap 100 75  $\mu\text{m}$   $\times$  2 cm C18 LC Columns (Thermo Scientific™) at flow rate of 5  $\mu\text{l}/\text{min}$  then separated with a Thermo RSLC Ultimate 3000 (Thermo Scientific™) from 5-20% solvent B (0.1% FA in 80% ACN) from 10-98 minutes at 300 nL/min and 50 °C with a 120 minutes total run time for fractions one and two. For fractions three to six, solvent B was used at 5-45% for the same duration. Eluted peptides were analyzed by a Thermo Orbitrap Fusion Lumos Tribrid (Thermo Scientific™) mass spectrometer in a data dependent acquisition mode using synchronous precursor selection method. A survey full scan MS (from m/z 375-1500) was acquired in the Orbitrap with a resolution of 120000. The AGC target for MS2 in iontrap was set as  $1 \times 10^4$  and ion filling time set as 150ms and fragmented using CID fragmentation with 35% normalized collision energy. The AGC target for MS3 in orbitrap was set as  $1 \times 10^5$  and ion filling time set as 200 ms with a scan range of 100-500 and fragmented using HCD with 65% normalized collision energy. Protein identification was performed using proteome discoverer software version 2.2 (Thermo Fisher Scientific) by searching MS/MS data against the UniProt mouse protein database. The search was set up for full tryptic peptides with a maximum of 2 missed cleavage sites. Oxidation, TMT6plex of the amino terminus, GG and GGQ ubiquitination, phosphorylation, and acetylation were included as variable modifications and carbamidomethylation and TMT6plex of the amino terminus were set as fixed modifications. The precursor mass tolerance threshold was set at 10 ppm for a maximum fragment mass error of 0.6 Da with a minimum peptide length of 6 and a maximum peptide length of 144. The significance threshold of the ion score was calculated based on a false

discovery rate calculated using the percolator node. Protein accessions were put into Ingenuity Pathway Analysis (QIAGEN Inc.) to identify gene symbols and localizations. Gene ontology pathway analysis was performed using DAVID Bioinformatics Database 6.8 using the functional annotation tool.

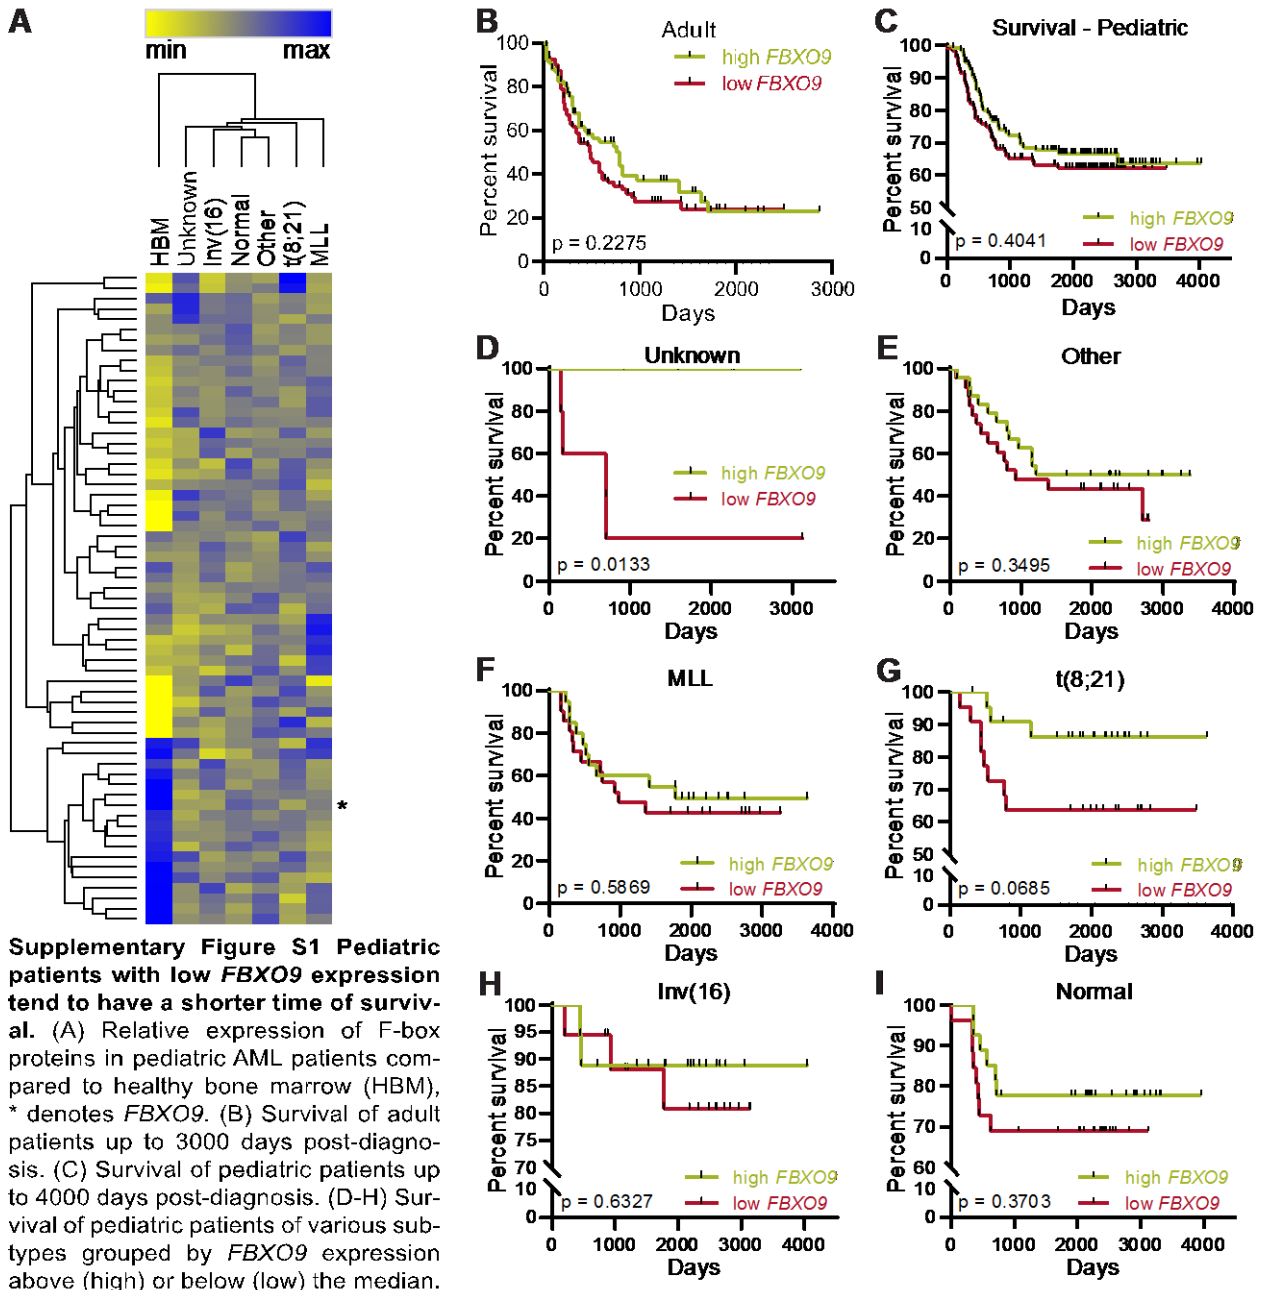

**A** FBXO9 Translation    Exon 3                      Exon 4                      Exon 5  
 Normal                      ... QELAKEEKAREL ... GALYEAIKFYRRA ...  
 Mutant                      ... QELAKEEK \_\_\_\_\_ PSSSTVGR ...

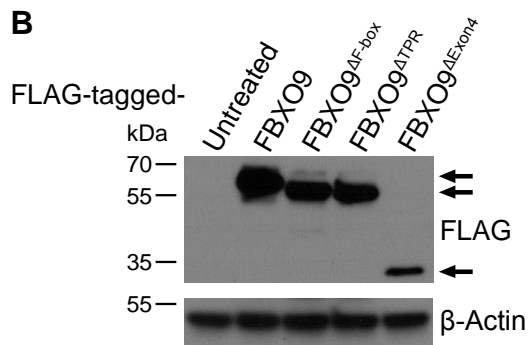

**Supplementary Figure S2 Deletion of *Fbxo9* exon 4 results in a frame shift and premature stop.** (A) Amino acid translation of sequenced cDNA from *Fbxo9*<sup>+/+</sup> and *Fbxo9*<sup>-/-</sup> mice. (B) Western blot expression of overexpressed flag-tagged FBXO9 with various deletion mutations.

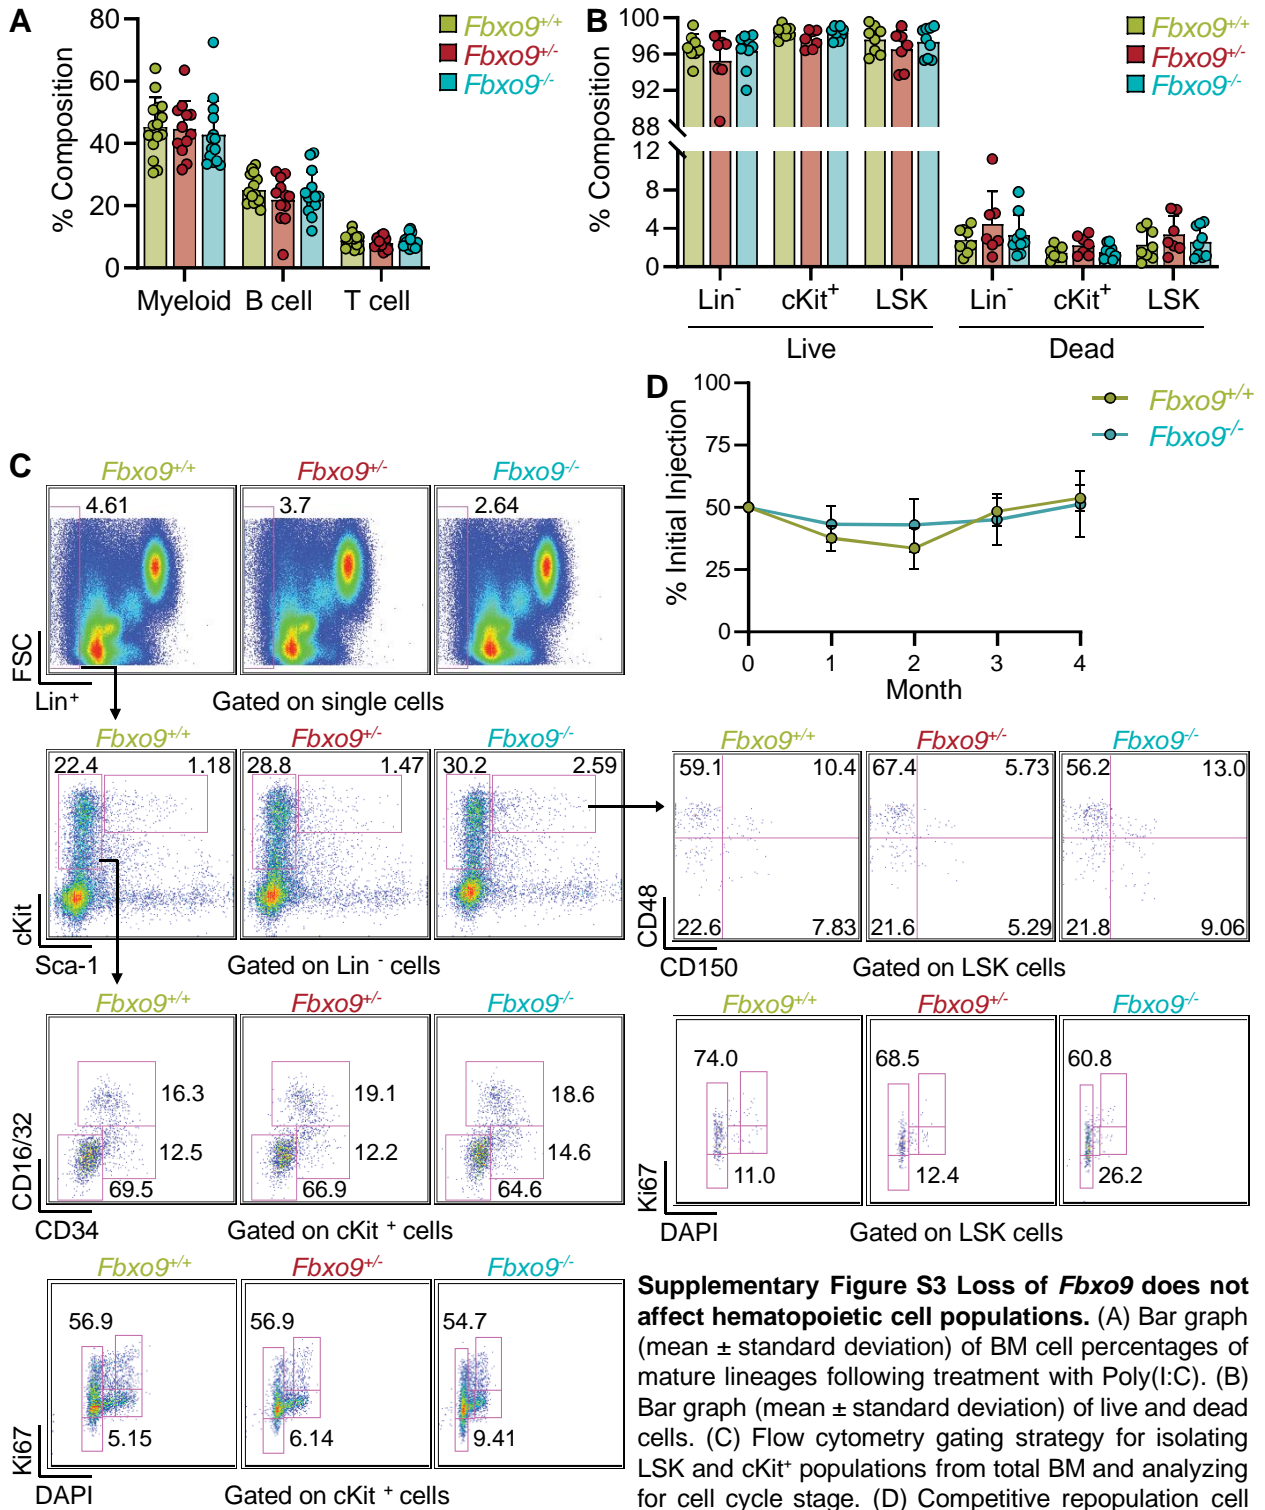

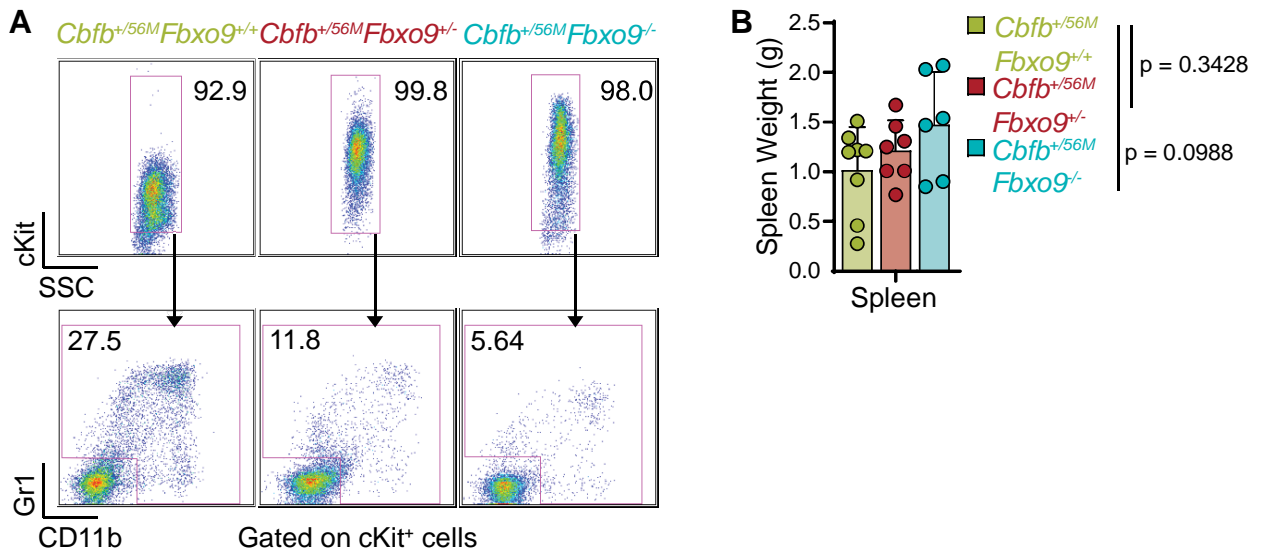

**Supplementary Figure S4 Mice with inv(16) AML and *Fbxo9* cKO have a more aggressive and homogeneous tumor.** (A) Representative FACS plots of tumor cells isolated from the BM of mice at time of sacrifice. Cells are first gated on total live singlets and subsequently on cKit<sup>+</sup> cells which are further analyzed for expression of Gr1/CD11b. (B) Bar graph (mean ± standard deviation) of spleen weight of mice at time of sacrifice.

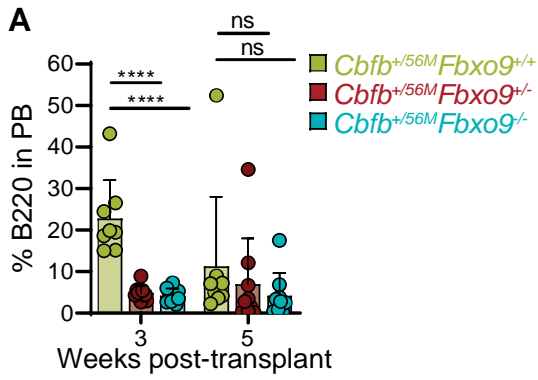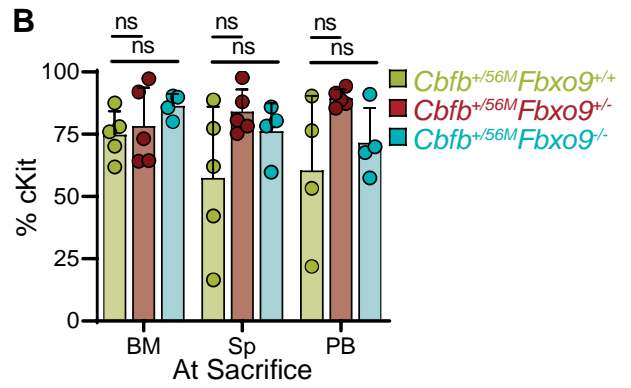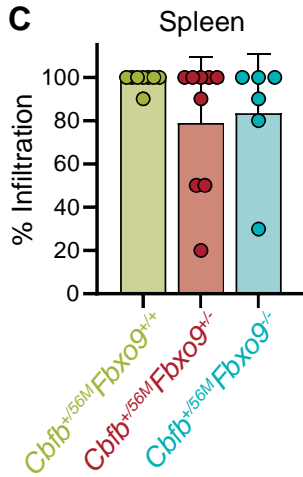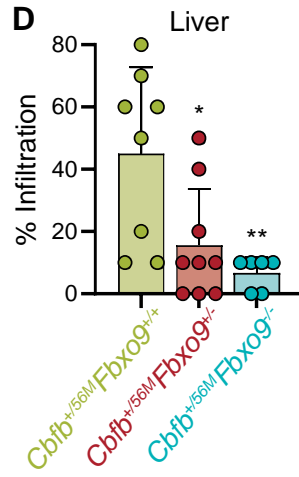

**Supplementary Figure S5 Mice with transplanted inv(16) tumor cells show a more aggressive phenotype for cells lacking *Fbxo9* expression.** (A) Bar graph of B cell (B220) expression in the PB following transplantation (mean  $\pm$  standard deviation). (B) Bar graph of percentage of cKit<sup>+</sup> tumor cells in the BM, spleen (Sp), and PB at time of sacrifice (mean  $\pm$  standard deviation, \*\*\*\*  $p < 0.0001$ ). (C-D) Bar graph of (C) spleen (*Cbfb*<sup>+/<sup>56M</sup> *Fbxo9*<sup>+/<sup>-</sup>,  $p = 0.0890$  and *Cbfb*<sup>+/<sup>56M</sup> *Fbxo9*<sup>-/<sup>-</sup>,  $p = 0.1356$ ) and (D) liver infiltration where each datapoint represents an individual mouse (\*  $p < 0.05$ , \*\*  $p < 0.01$ ).</sup></sup></sup></sup>

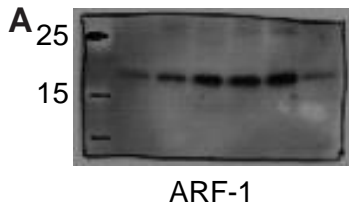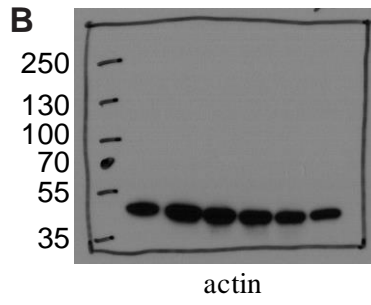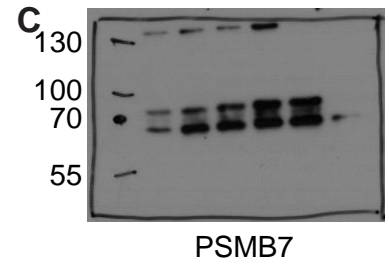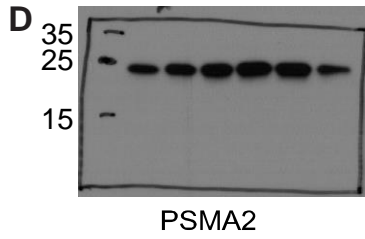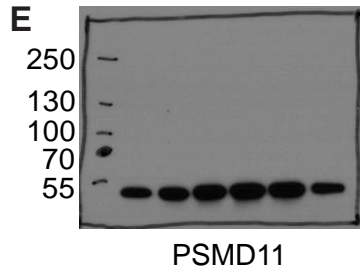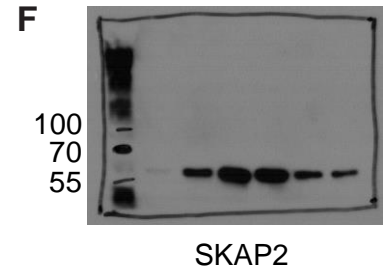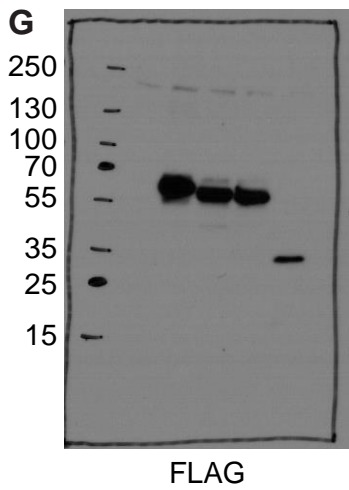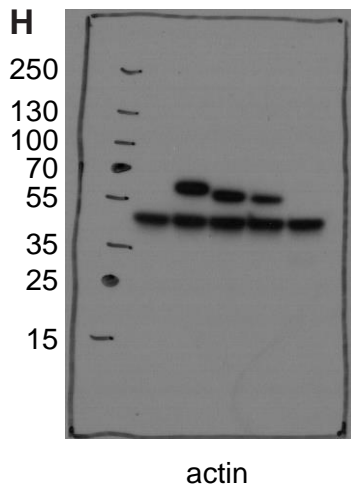

**Supplementary Figure S6 Western blots.** (A-F) Complete western blots corresponding to Figure 7B. (G-H) Complete western blots corresponding to Figure S2B.



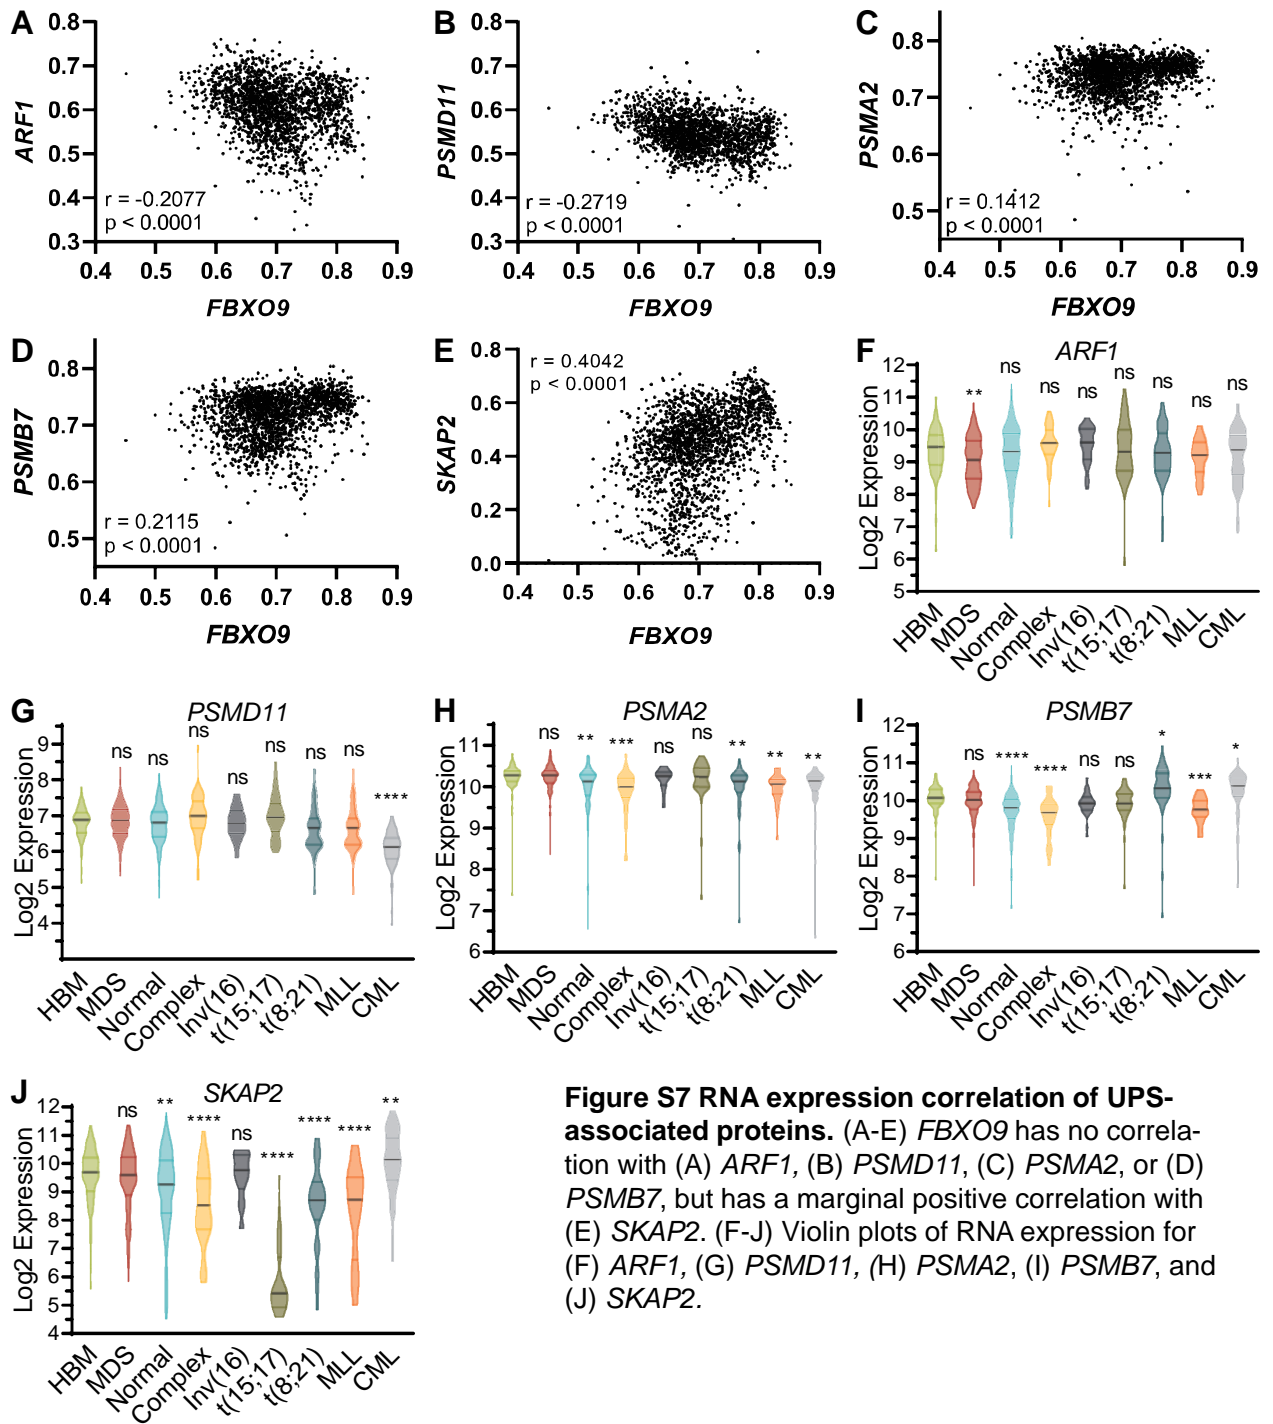

**Figure S7 RNA expression correlation of UPS-associated proteins.** (A-E) *FBXO9* has no correlation with (A) *ARF1*, (B) *PSMD11*, (C) *PSMA2*, or (D) *PSMB7*, but has a marginal positive correlation with (E) *SKAP2*. (F-J) Violin plots of RNA expression for (F) *ARF1*, (G) *PSMD11*, (H) *PSMA2*, (I) *PSMB7*, and (J) *SKAP2*.
